# Supplementary material for: Visualization of Spin Dynamics in Coupled Nuclear Multispin Systems
Source: Copernicus journal article supplement (doi:10.5194/mr-2022-9), 2022-05-16
Supplement: Supplementary file [file mr-2022-9-EC2-supplement.pdf]

Further on my comment on MR-2022-9:

Figure 7 from ‘Cross-Correlation of Chemical Shift Anisotropy and Dipolar Interactions in Methyl Protons Investigated by Selective Nuclear Magnetic Resonance Spectroscopy’ by N. Müller and G. Bodenhausen, *J. Chem. Phys.* 98, 6062-6069 (1993). This may serve as a warning for future generations against over-sophistication of graphical conventions.

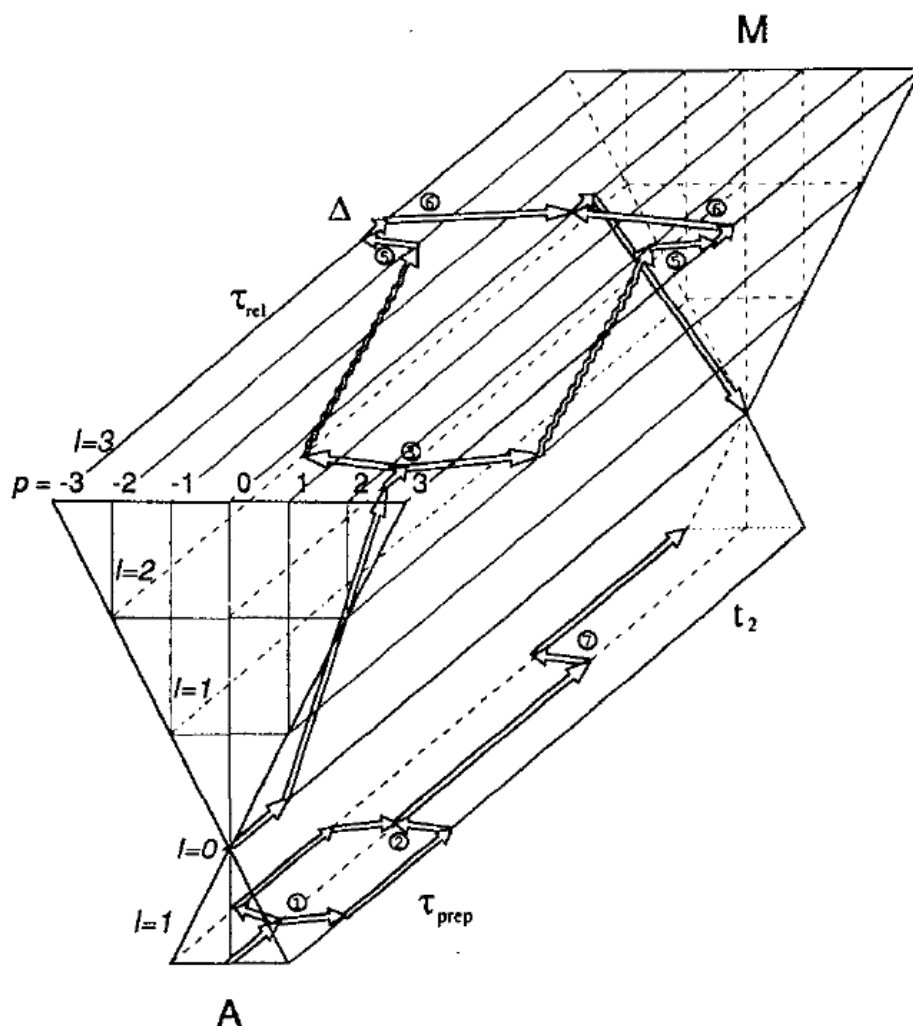

FIG. 7. Three-dimensional coherence transfer diagram for the pulse sequence in Fig. 6 applied to an  $AM_3$  system. The time axis runs from front to back. Horizontal levels represent tensor ranks  $l$ , while vertical planes represent coherence orders  $p$ . The upper wedge-shaped part of the diagram represents states  $T_{lp}^M$  that are accessible to the three equivalent methyl protons; the lower part corresponds to the states  $T_{lp}^A$  accessible to the  $A$  proton. RF pulses (indicated by circled numbers corresponding to Fig. 6) affect changes between vertical planes, while spin-spin coupling and multiexponential relaxation processes may be described by moving between different horizontal levels.
